# Supplementary material
Source: Springer Nature journal article supplement (https://www.springermedizin.de/resource/supplementary/12877_2009_177_MOESM5_ESM.pdf/9441336)

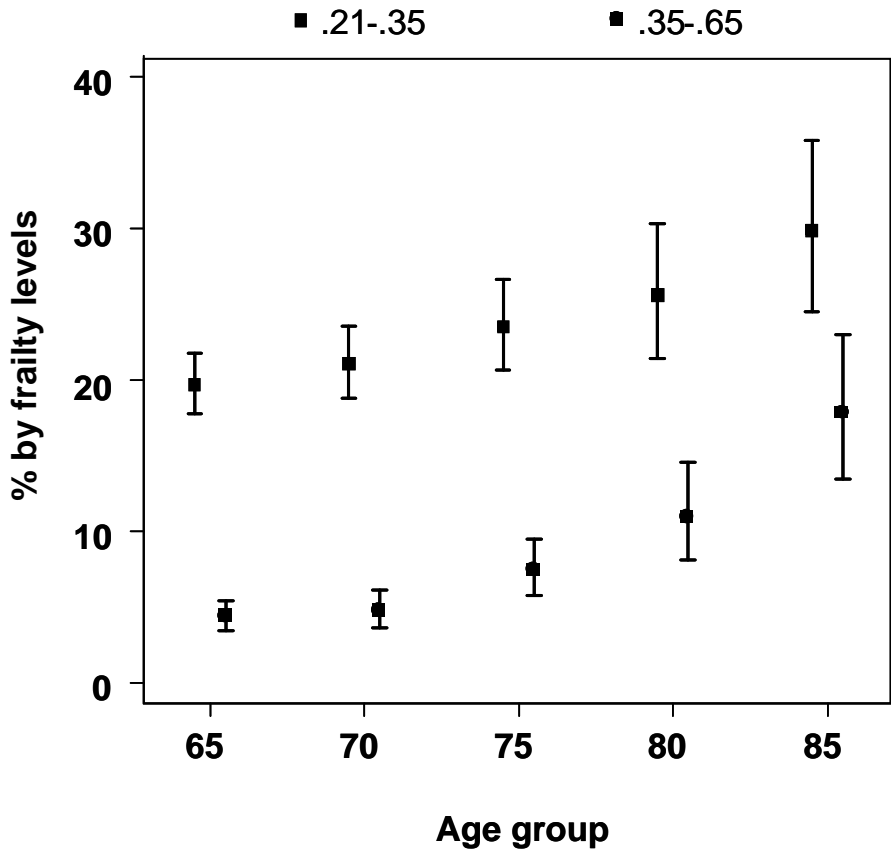

Supplement: MOESM5 [file 9441336]
